# Supplementary material for: Prekallikrein Deficiency Presenting as Recurrent Cerebrovascular Accident: Case Report and Review of the Literature
Source: Hindawi journal article supplement (doi:10.1155/2012/723204), 2012-01-01

Prekallikrein → Kallikrein

Contact phase of  
coagulation

Factor XII

HMWK

Factor XIIa

**Intrinsic Pathway**

Factor XI

Factor XIa

Factor IX

Factor IXa

Factor X

Factor VIIIa

Factor Xa

Prothrombin

Thrombin

Fibrinogen

Fibrin

Plasminogen

Plasmin

Fibrin degradation  
products

Tissue damage

Tissue Factor

Factor VIIa

Factor VII

Factor X

**Extrinsic Pathway**

**Final common  
pathway**

Factor XIIIa

Cross-linked  
Fibrin clot

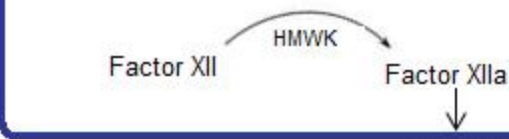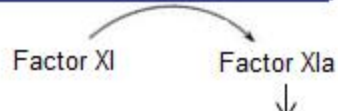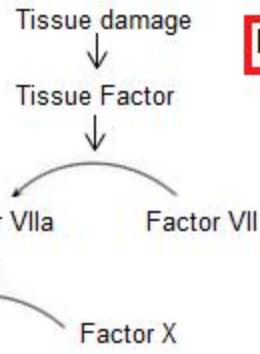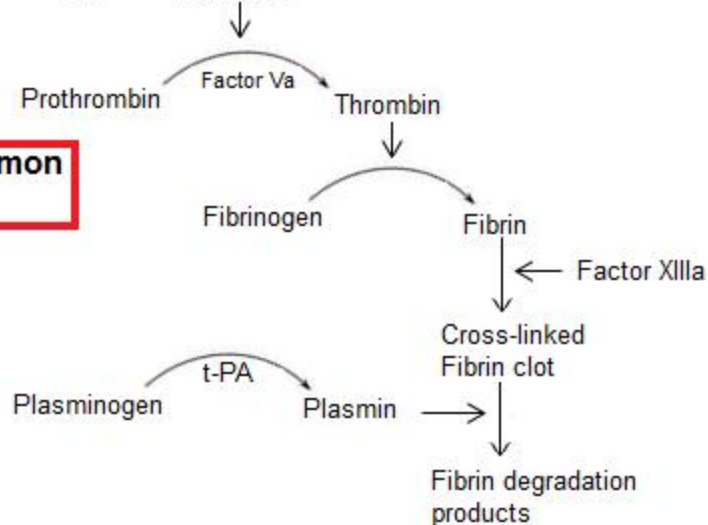

Supplement: f1 [file 723204.f1.pdf]
